# Supplementary material for: Identification and Characterization of the Most Common Genetic Variant Responsible for Acephalic Spermatozoa Syndrome in Men Originating from North Africa
Source: PubMed Central journal article supplement (PMC7927044; doi:10.3390/ijms22042187), 2021-02-22
Supplement: ijms-22-02187-s001.pdf [file ijms-22-02187-s001.pdf]

## SUPPLEMENTARY TABLES

Table 1. List of mutations previously identified in SUN5 implicated in Acephalic Spermatozoa syndrome.

| Gene Name | Chromosome Position | Coding Sequence Variant                           | Protein Variant                        | Cohort Description     | Mutated Subjects | Reference                  |
|-----------|---------------------|---------------------------------------------------|----------------------------------------|------------------------|------------------|----------------------------|
| SUN5      | 20:3157158-31592240 | c.824C>T                                          | p.Thr275Met                            |                        | 1                |                            |
|           |                     | c.851C>G                                          | p.Ser284*                              |                        | 1                |                            |
|           |                     | c.340G>A                                          | p.Gly114Arg                            |                        | 1                |                            |
|           |                     | c.1066C>T/<br>c.485T>A                            | p.Arg356Cys<br>and<br>p.Met162Lys      |                        | 1                |                            |
|           |                     | c.381delA/<br>c.824C>T                            | p.Val128Serfs*<br>7 and<br>p.Thr275Met | 17<br>unrelated<br>men | 1                | (Zhu et al., 2016)         |
|           |                     | c.381delA/<br>c.781G>A                            | p.Val128Serfs*<br>7 and<br>p.Val261Met |                        | 1                |                            |
|           |                     | c.216G>A/<br>c.1043A>T                            | p.Trp72* and<br>p.Asn348Ile            |                        | 1                |                            |
|           |                     | c.425+1G>A/c.1043<br>A>T                          | p.Asn348Ile                            |                        | 1                |                            |
|           |                     | GRCh38 -<br>chr20:32995761_32<br>990672delinsTGGT | p.Leu143Serfs*<br>30                   | 3 related<br>men       | 3                | (Elkhatib et al.,<br>2017) |
|           |                     | c.829C>T                                          | p.Gln277*                              |                        | 1                |                            |
|           |                     | c.1067G>A                                         | p.Arg356His                            | 3 unrelated<br>men     | 1                | (Fang et al., 2018)        |
|           |                     | c.211+1_211+<br>dupGT                             | p.Ser71Cysfs11<br>*                    |                        | 1                |                            |
|           |                     | c.381delA                                         | p.Val128Serfs*<br>7                    | 15<br>unrelated<br>men | 5                | (Sha et al., 2018a)        |
|           |                     | c.781G>A/<br>c.1043A>T                            | p.Val261Met<br>and<br>p.Asn348Ile      | 3 unrelated<br>men     | 1                | (Shang et al., 2018)       |

---

|                     |             |                        |   |                    |
|---------------------|-------------|------------------------|---|--------------------|
| c.425+1G>A/c.475C>T | p.Arg159*   |                        | 1 |                    |
| c.772C>T            | p.Arg258Cys | 11<br>unrelated<br>men | 1 | (Liu et al., 2020) |

---

**Table S2. Sequences of primers used and expected product sizes**

Primer sequences used for Sanger sequencing verification of *SUN5* mutations and respective melting temperatures (T<sub>m</sub>) and product sizes.

| Primer Name       | Primer Sequence (5'-3') | T <sub>m</sub> (°C) | Product Size (bp) |
|-------------------|-------------------------|---------------------|-------------------|
| SUN5_ Ex3-Forward | GTCCGCAACAATGACCAAGC    | 60                  | 406               |
| SUN5_ Ex3-Reverse | AAGAGGGATGACTGGGTGGA    | 60                  |                   |

**Table S3. Sperm-FISH analysis.**

Data were recorded from 24866 sperm cells from fertile controls (*n* = 5) and 6355 from *SUN5* mutated subjects affected by ASS.

|                 | Chrom.   | CTRL 1    | CTRL 2 | CTRL 3 | CTRL 4 | CTRL 5 | SUN5 P0166 | SUN5 P0386 | SUN5 PS1 | Mean CTRL ± SD | Mean SUN5 ± SD | <i>p</i> -Value |
|-----------------|----------|-----------|--------|--------|--------|--------|------------|------------|----------|----------------|----------------|-----------------|
| % Haploid Sperm | 21,X     | 48,7<br>7 | 49,80  | 49,26  | 49,07  | 50,12  | 48,57      | 51,46      | 48,38    | 49,41±0,55     | 49,47±1,73     | 0,95            |
|                 | 21,Y     | 50,2<br>7 | 49,42  | 49,69  | 50,00  | 49,01  | 50,30      | 47,56      | 50,46    | 49,68±0,49     | 49,44±1,63     | 0,82            |
| % Disomic Sperm | 21,XY    | 0,46      | 0,42   | 0,59   | 0,60   | 0,69   | 0,69       | 0,67       | 0,63     | 0,55±0,11      | 0,66±0,03      | 0,08            |
|                 | 21,XX    | 0,08      | 0,06   | 0,08   | 0,10   | 0,02   | 0,10       | 0,00       | 0,10     | 0,07±0,03      | 0,07±0,06      | 0,09            |
|                 | 21,YY    | 0,12      | 0,08   | 0,10   | 0,10   | 0,02   | 0,10       | 0,04       | 0,10     | 0,08±0,04      | 0,08±0,03      | 0,86            |
|                 | 21,21,X  | 0,04      | 0,06   | 0,04   | 0,04   | 0,02   | 0,05       | 0,04       | 0,05     | 0,04±0,01      | 0,05±0,00      | 0,33            |
|                 | 21,21,Y  | 0,08      | 0,06   | 0,06   | 0,04   | 0,04   | 0,05       | 0,09       | 0,05     | 0,06±0,02      | 0,06±0,02      | 0,72            |
| % Diploid Sperm | 21,21,XY | 0,06      | 0,04   | 0,08   | 0,00   | 0,06   | 0,10       | 0,09       | 0,14     | 0,05±0,03      | 0,11±0,03      | 0,04            |
|                 | 21,21,XX | 0,08      | 0,04   | 0,04   | 0,02   | 0,02   | 0,05       | 0,00       | 0,05     | 0,04±0,02      | 0,03±0,03      | 0,71            |
|                 | 21,21,YY | 0,04      | 0,02   | 0,06   | 0,02   | 0,00   | 0,00       | 0,04       | 0,05     | 0,03±0,02      | 0,03±0,03      | 0,89            |
